# Supplementary material for: Neighborhood Deprivation and Risks of Autoimmune Disorders: A National Cohort Study in Sweden
Source: MDPI journal article supplement (doi:10.3390/ijerph16203798), 2019-10-09
Supplement: s1 [file s1]

Supplementary

**Table S1.** Population sizes and neighborhood characteristics by neighborhood-level deprivation.

| Individual Variables           | Neighborhood Deprivation |              |             |
|--------------------------------|--------------------------|--------------|-------------|
|                                | Low                      | Moderate     | High        |
| Number of neighborhoods        | 1898                     | 5069         | 1396        |
| Number of people               |                          |              |             |
| Men                            | 648737                   | 1598838      | 451243      |
| Women                          | 667387                   | 1581240      | 430915      |
| Percent of people              |                          |              |             |
| Men                            | 24.0                     | 59.2         | 16.7        |
| Women                          | 24.9                     | 59.0         | 16.1        |
| Neighborhood deprivation index |                          |              |             |
| Range                          | -3.0 to -1               | -1 to 1      | > 1 to 10.7 |
| Mean                           | -1.47 ± 0.32             | -0.12 ± 0.54 | 2.47 ± 1.65 |
| Median                         | -1.42                    | -0.17        | 1.84        |

**Table S2.** Baseline characteristics of study population in neighborhoods.

| Individual Variables                                 | Neighborhood deprivation |      |                      |      |                 |      | p-value |
|------------------------------------------------------|--------------------------|------|----------------------|------|-----------------|------|---------|
|                                                      | Low (n=1316124)          |      | Moderate (n=3180078) |      | High (n=882158) |      |         |
|                                                      | No.                      | %    | No.                  | %    | No.             | %    |         |
| Gender                                               |                          |      |                      |      |                 |      | < 0.001 |
| Male                                                 | 648,737                  | 49.3 | 1,598,838            | 50.3 | 451,243         | 51.2 |         |
| Female                                               | 667,387                  | 50.7 | 1,581,240            | 49.7 | 430,915         | 48.8 |         |
| Age (years)                                          |                          |      |                      |      |                 |      | < 0.001 |
| 25-34                                                | 283,917                  | 21.6 | 706,280              | 22.2 | 220,235         | 25.0 |         |
| 35-44                                                | 313,738                  | 23.8 | 691,575              | 21.7 | 200,164         | 22.7 |         |
| 45-54                                                | 311,337                  | 23.7 | 717,733              | 22.6 | 183,933         | 20.9 |         |
| 55-64                                                | 257,486                  | 19.6 | 611,297              | 19.2 | 152,063         | 17.2 |         |
| 65-74                                                | 149,646                  | 11.4 | 453,193              | 14.3 | 125,763         | 14.3 |         |
| Family income                                        |                          |      |                      |      |                 |      | < 0.001 |
| Low income                                           | 201,198                  | 15.3 | 805,251              | 25.3 | 338,970         | 38.4 |         |
| Middle-low income                                    | 276,554                  | 21.0 | 834,747              | 26.2 | 234,529         | 26.6 |         |
| Middle-high income                                   | 342,589                  | 26.0 | 815,914              | 25.7 | 186,321         | 21.1 |         |
| High income                                          | 495,783                  | 37.7 | 724,166              | 22.8 | 122,338         | 13.9 |         |
| Marital status                                       |                          |      |                      |      |                 |      | < 0.001 |
| Married/cohabiting                                   | 773,899                  | 58.8 | 1,613,298            | 50.7 | 386,450         | 43.8 |         |
| Never married, Widowed, or divorced                  | 542,225                  | 41.2 | 1,566,780            | 49.3 | 495,708         | 56.2 |         |
| Immigrant status                                     |                          |      |                      |      |                 |      | < 0.001 |
| Sweden                                               | 1,183,153                | 89.9 | 2,833,395            | 89.1 | 608,049         | 68.9 |         |
| Other countries                                      | 132,971                  | 10.1 | 346,683              | 10.9 | 274,109         | 31.1 |         |
| Educational attainment                               |                          |      |                      |      |                 |      | < 0.001 |
| ≤ 9 years                                            | 109,937                  | 8.4  | 537,798              | 16.9 | 202,258         | 22.9 |         |
| 10-12                                                | 96,587                   | 7.3  | 337,664              | 10.6 | 118,200         | 13.4 |         |
| > 12 years                                           | 1,109,600                | 84.3 | 2,304,616            | 72.5 | 561,700         | 63.7 |         |
| Region of residence                                  |                          |      |                      |      |                 |      | < 0.001 |
| Large cities                                         | 852,911                  | 64.8 | 1,398,287            | 44.0 | 468,925         | 53.2 |         |
| Southern Sweden                                      | 315,772                  | 24.0 | 1,201,989            | 37.8 | 271,388         | 30.8 |         |
| Nothern Sweden                                       | 147,441                  | 11.2 | 579,802              | 18.2 | 141,845         | 16.1 |         |
| Move                                                 |                          |      |                      |      |                 |      | < 0.001 |
| Not moved                                            | 922,918                  | 70.1 | 2,,282,408           | 71.8 | 573,323         | 65.0 |         |
| Moved                                                | 393,206                  | 29.9 | 897,670              | 28.2 | 308,835         | 35.0 |         |
| Hospitalization of chronic lower respiratory disease |                          |      |                      |      |                 |      | < 0.001 |
| No                                                   | 1,294,352                | 98.3 | 3,108,674            | 97.8 | 856,254         | 97.1 |         |

|                                                         |           |      |           |      |         |      |         |
|---------------------------------------------------------|-----------|------|-----------|------|---------|------|---------|
| Yes                                                     | 21,772    | 1.7  | 71,404    | 2.2  | 25,904  | 2.9  | < 0.001 |
| Hospitalization of alcoholism and related liver disease |           |      |           |      |         |      |         |
| No                                                      | 1,297,071 | 98.6 | 3,112,765 | 97.9 | 851,595 | 96.5 |         |
| Yes                                                     | 19,053    | 1.4  | 67,313    | 2.1  | 30,563  | 3.5  |         |

**Table S3.** Odds ratio (OR) and 95% confidence intervals (CI) for autoimmune disorders; Results of logistics regression models.

| Variables                                                         | Model 1 |        |      | Model 2 |        |      | Model 3 |        |      | Model 4 |        |      | <i>p</i> -value |
|-------------------------------------------------------------------|---------|--------|------|---------|--------|------|---------|--------|------|---------|--------|------|-----------------|
|                                                                   | OR      | 95% CI |      | OR      | 95% CI |      | OR      | 95% CI |      | OR      | 95% CI |      |                 |
| <b>Neighborhood-level variable (ref. Low)</b>                     |         |        |      |         |        |      |         |        |      |         |        |      |                 |
| Moderate                                                          | 1.23    | 1.20   | 1.25 | 1.20    | 1.17   | 1.22 | 1.13    | 1.11   | 1.15 | 1.12    | 1.10   | 1.14 | < 0.001         |
| High                                                              | 1.31    | 1.28   | 1.34 | 1.31    | 1.28   | 1.34 | 1.20    | 1.18   | 1.23 | 1.18    | 1.15   | 1.21 | < 0.001         |
| Age                                                               |         |        |      | 1.03    | 1.03   | 1.03 | 1.03    | 1.03   | 1.03 | 1.03    | 1.03   | 1.03 | < 0.001         |
| Gender to male (ref. female)                                      |         |        |      | 1.22    | 1.21   | 1.24 | 1.21    | 1.19   | 1.22 | 1.22    | 1.21   | 1.24 | < 0.001         |
| Family income (ref. High income)                                  |         |        |      |         |        |      |         |        |      |         |        |      |                 |
| Low income                                                        |         |        |      |         |        |      | 1.24    | 1.21   | 1.26 | 1.21    | 1.18   | 1.23 | < 0.001         |
| Middle-low income                                                 |         |        |      |         |        |      | 1.31    | 1.28   | 1.34 | 1.27    | 1.25   | 1.30 | < 0.001         |
| Middle-high income                                                |         |        |      |         |        |      | 1.20    | 1.18   | 1.23 | 1.18    | 1.16   | 1.21 | < 0.001         |
| Marital status (ref. Married/co-habiting)                         |         |        |      |         |        |      |         |        |      |         |        |      |                 |
| Never married, widowed, or divorced                               |         |        |      |         |        |      | 1.18    | 1.17   | 1.20 | 1.15    | 1.13   | 1.16 | < 0.001         |
| Immigrant status (ref. Born in Sweden)                            |         |        |      |         |        |      | 0.85    | 0.83   | 0.87 | 0.85    | 0.83   | 0.87 | < 0.001         |
| Education attainment (ref. > 12 years)                            |         |        |      |         |        |      |         |        |      |         |        |      |                 |
| ≤ 9 years                                                         |         |        |      |         |        |      | 1.13    | 1.11   | 1.15 | 1.12    | 1.10   | 1.14 | < 0.001         |
| 10–12 years                                                       |         |        |      |         |        |      | 1.15    | 1.12   | 1.17 | 1.13    | 1.10   | 1.15 | < 0.001         |
| Region of residence (ref. Large cities)                           |         |        |      |         |        |      |         |        |      |         |        |      |                 |
| Southern Sweden                                                   |         |        |      |         |        |      | 0.95    | 0.94   | 0.97 | 0.96    | 0.95   | 0.98 | < 0.001         |
| Northern Sweden                                                   |         |        |      |         |        |      | 0.99    | 0.97   | 1.01 | 1.00    | 0.98   | 1.02 | 0.786           |
| Move (ref. Not moved)                                             |         |        |      |         |        |      | 1.06    | 1.04   | 1.08 | 1.04    | 1.02   | 1.06 | < 0.001         |
| Hospitalization of chronic lower respiratory disease (ref. No)    |         |        |      |         |        |      |         |        |      | 2.04    | 1.98   | 2.10 | < 0.001         |
| Hospitalization of alcoholism and related liver disease (ref. No) |         |        |      |         |        |      |         |        |      | 1.72    | 1.66   | 1.78 | < 0.001         |

Model 1: crude model; Model 2: adjusted for age and gender; Model 3: adjusted for age, gender, family income, marital status, country of birth, education, region of residence, and move; Model 4: adjusted for age, gender, family income, marital status, country of birth, education, region of residence, move, and hospitalization of chronic low respiratory disease and alcoholism and related liver disease

**Table S4.** Hazard ratios (HR) and 95% confidence intervals (CI) for autoimmune disorders; Results of Cox regression models.

| Variables                                                         | Model 1 |        |      | Model 2 |        |      | Model 3 |        |      | Model 4 |        |      | <i>p</i> -value |
|-------------------------------------------------------------------|---------|--------|------|---------|--------|------|---------|--------|------|---------|--------|------|-----------------|
|                                                                   | HR      | 95% CI |      | HR      | 95% CI |      | HR      | 95% CI |      | HR      | 95% CI |      |                 |
| Neighborhood-level variable (ref. Low)                            |         |        |      |         |        |      |         |        |      |         |        |      |                 |
| Moderate                                                          | 1.23    | 1.21   | 1.25 | 1.20    | 1.18   | 1.22 | 1.12    | 1.10   | 1.14 | 1.12    | 1.10   | 1.14 | < 0.0001        |
| High                                                              | 1.33    | 1.30   | 1.36 | 1.34    | 1.31   | 1.37 | 1.21    | 1.18   | 1.24 | 1.18    | 1.16   | 1.21 | < 0.0001        |
| Age                                                               |         |        |      | 1.03    | 1.03   | 1.03 | 1.03    | 1.03   | 1.03 | 1.03    | 1.03   | 1.03 | < 0.0001        |
| Gender to male (ref. female)                                      |         |        |      | 1.20    | 1.18   | 1.21 | 1.18    | 1.16   | 1.20 | 1.20    | 1.18   | 1.21 | < 0.0001        |
| Family income (ref. High income)                                  |         |        |      |         |        |      |         |        |      |         |        |      |                 |
| Low income                                                        |         |        |      |         |        |      | 1.27    | 1.24   | 1.30 | 1.24    | 1.21   | 1.27 | < 0.0001        |
| Middle-low income                                                 |         |        |      |         |        |      | 1.33    | 1.31   | 1.36 | 1.29    | 1.27   | 1.32 | < 0.0001        |
| Middle-high income                                                |         |        |      |         |        |      | 1.21    | 1.18   | 1.23 | 1.19    | 1.16   | 1.21 | < 0.0001        |
| Marital status (ref. Married/cohabiting)                          |         |        |      |         |        |      |         |        |      |         |        |      |                 |
| Never married, widowed, or divorced                               |         |        |      |         |        |      | 1.20    | 1.19   | 1.22 | 0.88    | 0.86   | 0.89 | < 0.0001        |
| Immigrant status (ref. Born in Sweden)                            |         |        |      |         |        |      | 0.87    | 0.86   | 0.89 | 0.88    | 0.86   | 0.89 | < 0.0001        |
| Education attainment (ref. > 12 years)                            |         |        |      |         |        |      |         |        |      |         |        |      |                 |
| ≤ 9 years                                                         |         |        |      |         |        |      | 1.15    | 1.13   | 1.17 | 1.14    | 1.12   | 1.16 | < 0.0001        |
| 10–12 years                                                       |         |        |      |         |        |      | 1.14    | 1.12   | 1.17 | 1.12    | 1.10   | 1.15 | < 0.0001        |
| Region of residence (ref. Large cities)                           |         |        |      |         |        |      |         |        |      |         |        |      |                 |
| Southern Sweden                                                   |         |        |      |         |        |      | 0.95    | 0.93   | 0.96 | 0.96    | 0.94   | 0.97 | < 0.0001        |
| Northern Sweden                                                   |         |        |      |         |        |      | 0.98    | 0.96   | 1.00 | 0.99    | 0.97   | 1.01 | 0.451           |
| Move (ref. Not moved)                                             |         |        |      |         |        |      | 1.07    | 1.06   | 1.09 | 1.06    | 1.04   | 1.07 | < 0.0001        |
| Hospitalization of chronic lower respiratory disease (ref. No)    |         |        |      |         |        |      |         |        |      | 2.13    | 2.07   | 2.19 | < 0.0001        |
| Hospitalization of alcoholism and related liver disease (ref. No) |         |        |      |         |        |      |         |        |      | 1.82    | 1.75   | 1.88 | < 0.0001        |

Model 1: crude model; Model 2: adjusted for age and gender; Model 3: adjusted for age, gender, family income, marital status, country of birth, education, region of residence, and move; Model 4: adjusted for age, gender, family income, marital status, country of birth, education, region of residence, move, and hospitalization of chronic low respiratory disease and alcoholism and related liver disease

**Table S5.** Odds ratio (OR) and 95% confidence intervals (CI) for autoimmune disorders for each of the four deprivation indicators in the neighborhood deprivation index\*.

| Neighborhood-level Variables | High | Moderate |           | Low  |           |
|------------------------------|------|----------|-----------|------|-----------|
|                              | OR   | OR       | 95% CI    | OR   | 95% CI    |
| Neighborhood income          | 1.00 | 1.02     | 1.00 1.04 | 1.05 | 1.03 1.08 |
| Neighborhood education       | 1.00 | 1.11     | 1.09 1.13 | 1.18 | 1.16 1.21 |
| Neighborhood social welfare  | 1.00 | 1.07     | 1.05 1.09 | 1.15 | 1.12 1.17 |
| Neighborhood employment      | 1.00 | 1.10     | 1.08 1.12 | 1.17 | 1.14 1.19 |

\*Adjusted for full model.

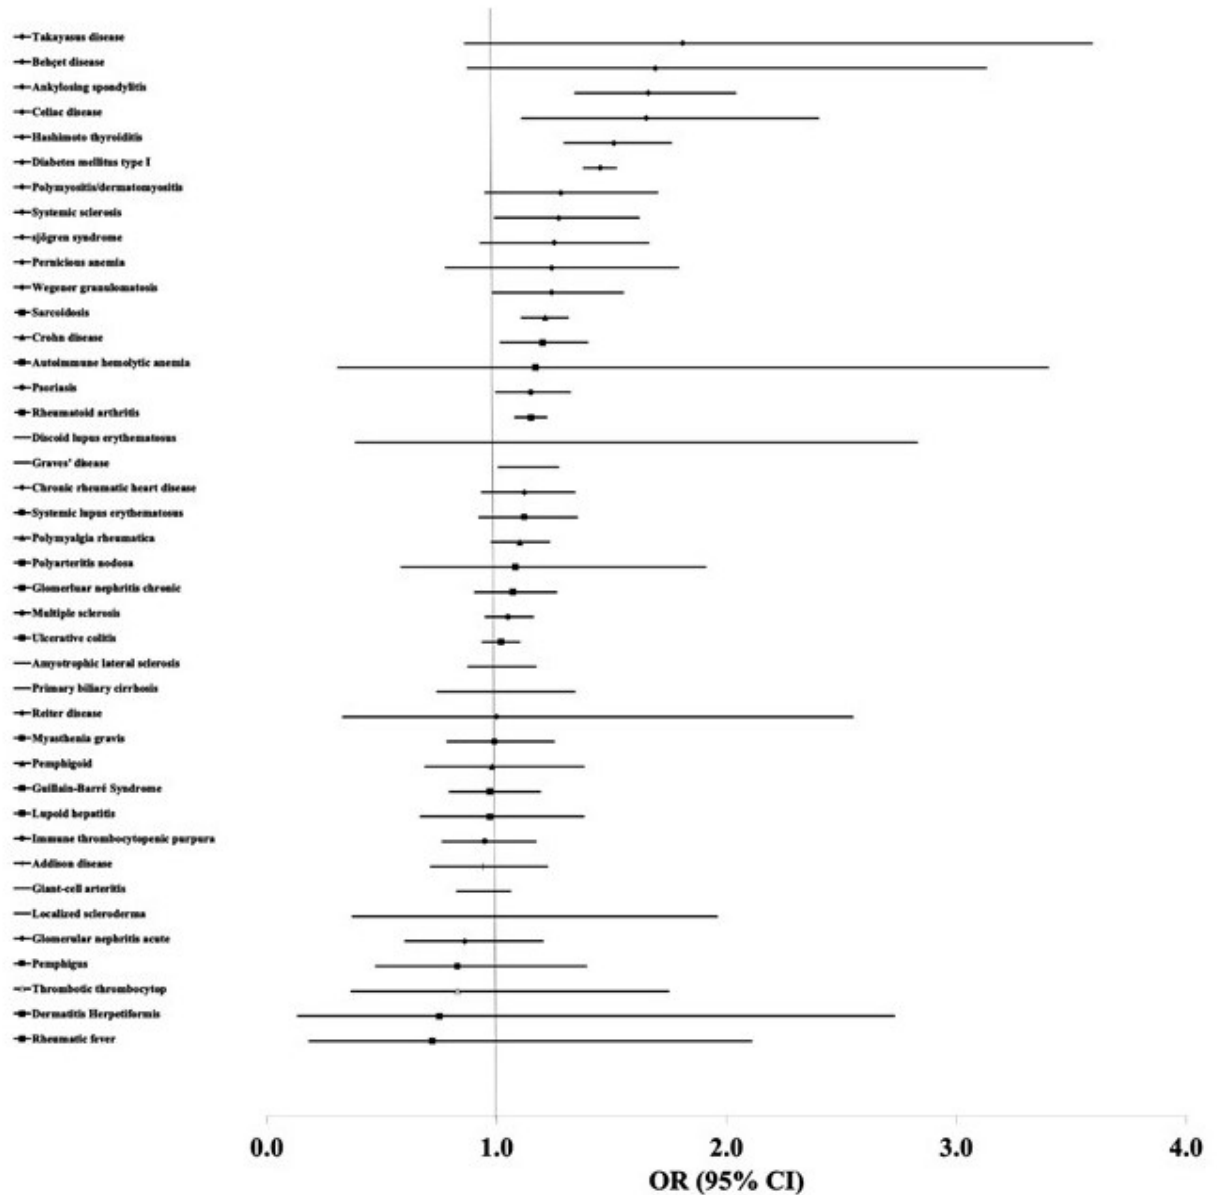

**Figure S1.** Adjusted Odds ratios (OR) for autoimmune disorders for individuals living a high level of neighborhood deprivation compared with low level of neighborhood deprivation. Whiskers are 95% confidence intervals. \*Data was based on the Table 5, OR of angitis hypersensitive (OR=5.14, 95% 1.05-25.19) was not shown in the figure.
